# Supplementary material for: A “lignin-first” biorefinery towards efficient aromatic monomer conversion from coconut shells using mild TMAH-based alkaline deep eutectic solvents
Source: Royal Society of Chemistry journal article supplement (doi:10.1039/d4gc05498a), 2025-01-01
Supplement: d4gc05498a1.pdf [file d4gc05498a1.pdf]

## Supplementary information

### **“Lignin-First” biorefinery towards efficient aromatic monomer conversion from coconut shells using mild TMAH-based alkaline deep eutectic solvents**

Chenjun He<sup>a</sup>, Fengqi Luo<sup>a</sup>, Yongzhi Zhu<sup>a</sup>, Ao Zhan<sup>a</sup>, Jiajun Fan<sup>c</sup>, James H. Clark<sup>c</sup>, Jie Lv<sup>b,\*</sup> Qiang Yu<sup>a,\*</sup>

<sup>a</sup>*South China Agricultural University, Institute of Biomass Engineering, Key Laboratory of Energy Plants Resource and Utilization, Ministry of Agriculture and Rural Affairs, Guangdong Engineering Technology Research Center of Agricultural and Forestry Biomass, Guangzhou 510642, China*

<sup>b</sup>*Guangdong Polytechnic Normal University, School of Mechatronic Engineering, Guangzhou 510450, China*

<sup>c</sup>*Green Chemistry Centre of Excellence, Department of Chemistry, University of York, York, YO10 5DD, UK*

*\*Co-Corresponding author*

*Qiang Yu, E-mail address: [yuqiang@scau.edu.cn](mailto:yuqiang@scau.edu.cn)*

#### **Content list:**

**Supplementary text (Supplementary materials and methods)**

**Nine figures (Fig S1, S2, S3, S4, S5, S6, S7, S8, S9 and S10)**

**Four Tables (Table S1, S2, S3 and S4)**

## Supplementary materials and methods:

The milled wood lignin (MWL) was extracted by ball milling and 1,4-dioxane/water (96/4, v/v) solvent system. In detail, the coconut shells after 24 h ball milling were reacted with 1,4-dioxane/water (96/4, v/v) at 80°C for 12 h to extract lignin. After the reaction, the mixture was solid-liquid separated via Vacuum filtration to obtain the liquid fraction rich in lignin. Then, the liquid part was rotary evaporation at 60°C for removing water and 1,4-dioxane. To further purify the lignin, dissolve it with acetic acid/water (9:1, v/v) and add the slurry to water to precipitate the lignin. Subsequently, the precipitated lignin was washed to neutral and vacuum-dried for future structural characterization.

The cellulose and hemicellulose recovery, delignification ratio are calculated based on the chemical compositions of the untreated sample according to the following eqs:<sup>1</sup>

$$\text{Cellulose recovery (\%)} = \frac{\text{The weight of cellulose in treated sample (g)}}{\text{The weight of cellulose in untreated sample (g)}} \times 100\%$$

(S1)

$$\text{Hemicellulose recovery (\%)} = \frac{\text{The weight of hemicellulose in treated sample (g)}}{\text{The weight of hemicellulose in untreated sample (g)}} \times 100\%$$

(S2)

$$\text{Delignification ratio (\%)} = 1 - \frac{\text{The weight of lignin in treated sample (g)}}{\text{The weight of lignin in untreated sample (g)}} \times 100\%$$

(S3)

The <sup>1</sup>H nuclear magnetic resonance (NMR) of solvent was determined by an NMR spectrometer (AV II 600 MHz spectrometer, Bruker, Germany). The HBA, HBD and the prepared solvent were dissolved in DMSO-d<sub>6</sub> for determining. Since lysine is insoluble in DMSO, D<sub>2</sub>O was employed for dissolving it.

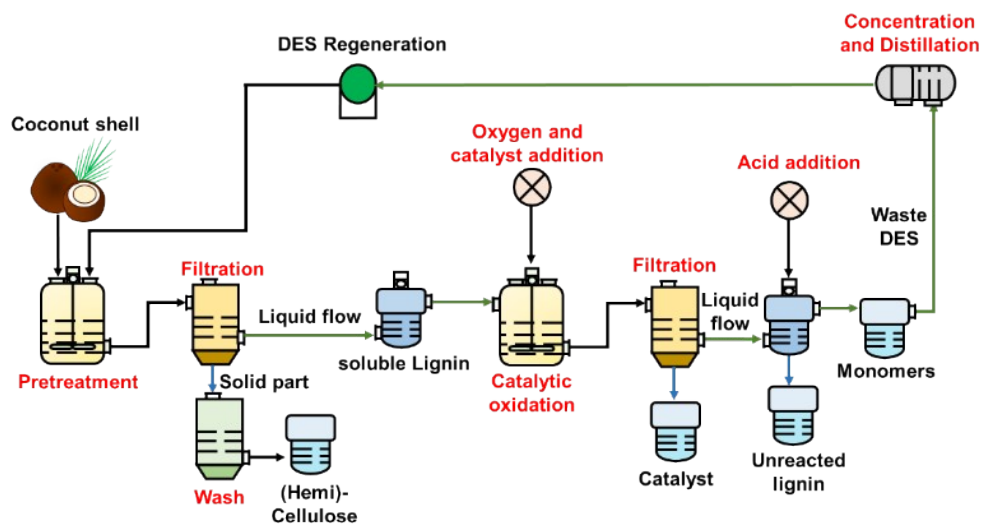

**Fig. S1** Technical route of lignocellulose fraction and depolymerization.

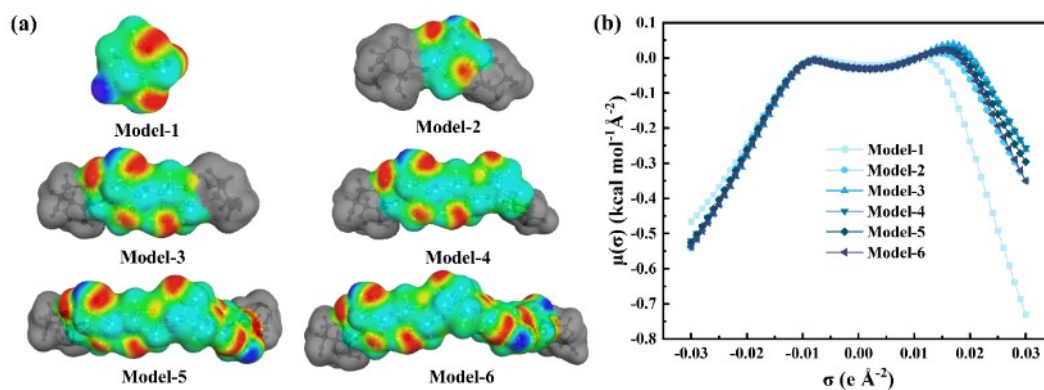

**Fig. S2** COSMO-RS charge surfaces (a) and (b)  $\sigma$ -potentials of hemicellulose models (Model-1: xylose; Model-2: mid-monomer of xylotriose; Model-3: mid-dimer of xylootetrose; Model-4: mid-trimer of xylopentose; Model-5: mid-tetramer of xylohexose; Model-6: mid-pentamer of xyloheptose) predicted by COSMO-RS. In a, the extent of the screening charge varies from  $-0.03 e \text{ \AA}^{-2}$  to  $+0.03 e \text{ \AA}^{-2}$ . Red and blue represent positive and negative surface screening charges, respectively, and green represents neutral charges.

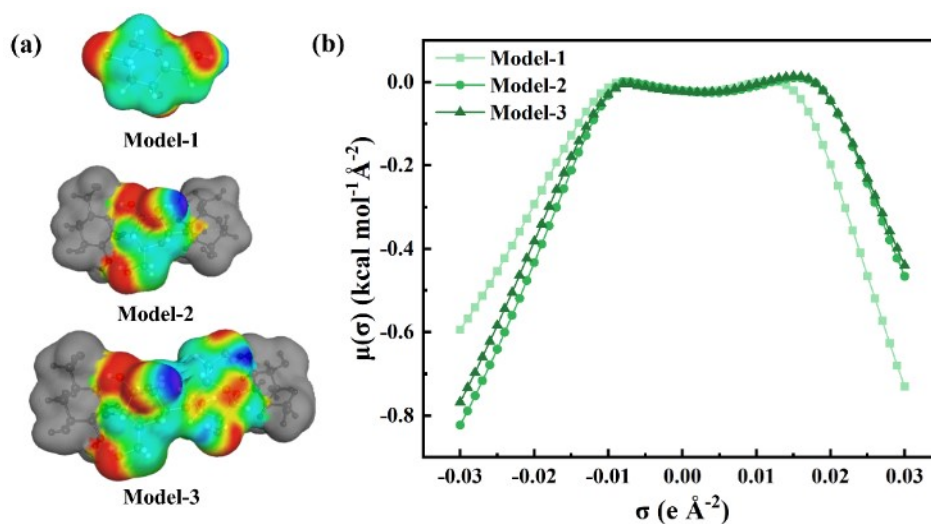

**Fig. S3** COSMO-RS charge surfaces (a) and (b)  $\sigma$ -Potentials of cellulose models (Model-1: glucose; Model-2: mid-monomer of glucotriose; Model-3: mid-dimer of glucotetrose) predicted by COSMO-RS. In a, the extent of the screening charge varies from  $-0.03 \text{ e \AA}^{-2}$  to  $+0.03 \text{ e \AA}^{-2}$ . Red and blue represent positive and negative surface screening charges, respectively, and green represents neutral charges.

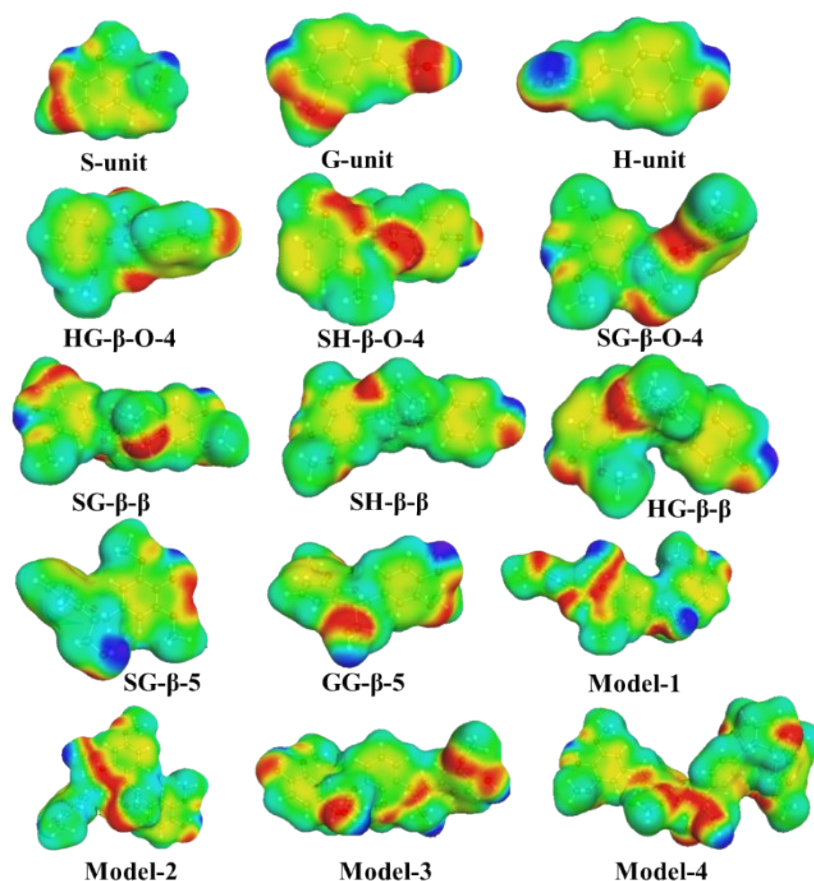

**Fig. S4** COSMO-RS charge surfaces of lignin models (S-unit; G-unit; H-unit; HG- $\beta$ -O-4: H-unit and G-unit connected by  $\beta$ -O-4 linkage; SH- $\beta$ -O-4: S-unit and H-unit connected by  $\beta$ -O-4 linkage; SG- $\beta$ -O-4: S-unit and G-unit connected by  $\beta$ -O-4 linkage; SG- $\beta$ - $\beta$ : S-unit and G-unit connected by  $\beta$ - $\beta$  linkage; SH- $\beta$ - $\beta$ : S-unit and H-unit connected by  $\beta$ - $\beta$  linkage; HG- $\beta$ - $\beta$ : H-unit and G-unit connected by  $\beta$ - $\beta$  linkage; SG- $\beta$ -5: S-unit and G-unit connected by  $\beta$ -5 linkage; GG- $\beta$ -5: G-unit and G-unit connected by  $\beta$ -5 linkage; Model-1, Model-2 and Model-3: three unit connected by  $\beta$ -O-4 at different benzene ring locations; Model-4: four unit connected by three types of linkages) built by COSMO-RS. The extent of the screening charge varies from  $-0.03 e \text{ \AA}^{-2}$  to  $+0.03 e \text{ \AA}^{-2}$ . Red and blue represent positive and negative surface screening charges, respectively, and green represents neutral charges.

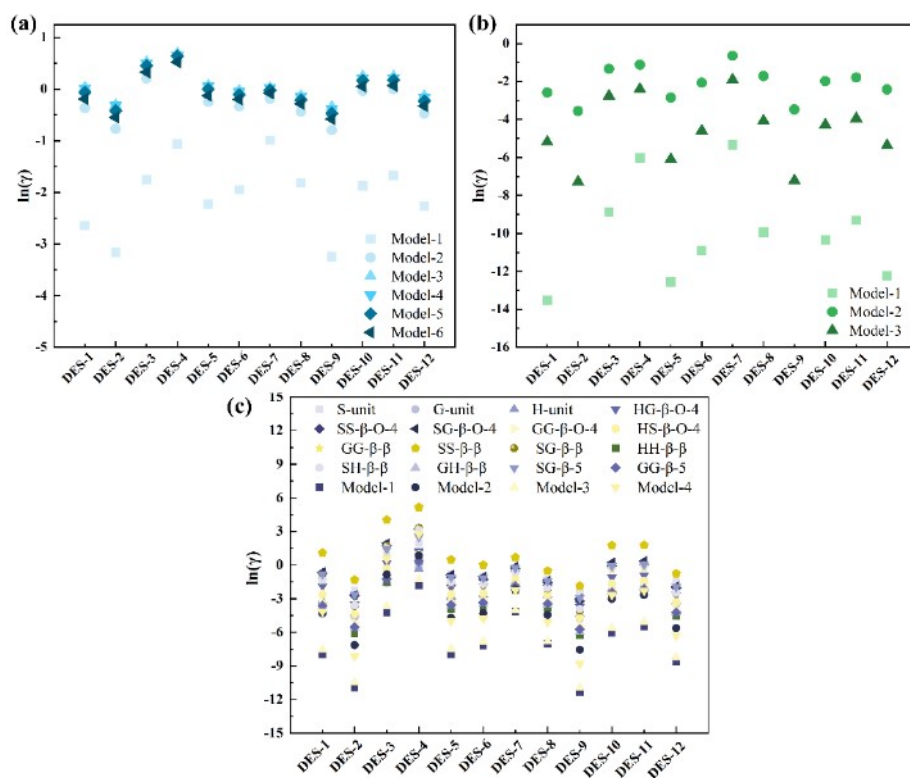

**Fig. S5** Activity coefficients of lignocellulosic models in different solvent systems (Take 12 of these solvents as examples) (120°C): (a) hemicellulose, (b) cellulose, and (c) lignin.

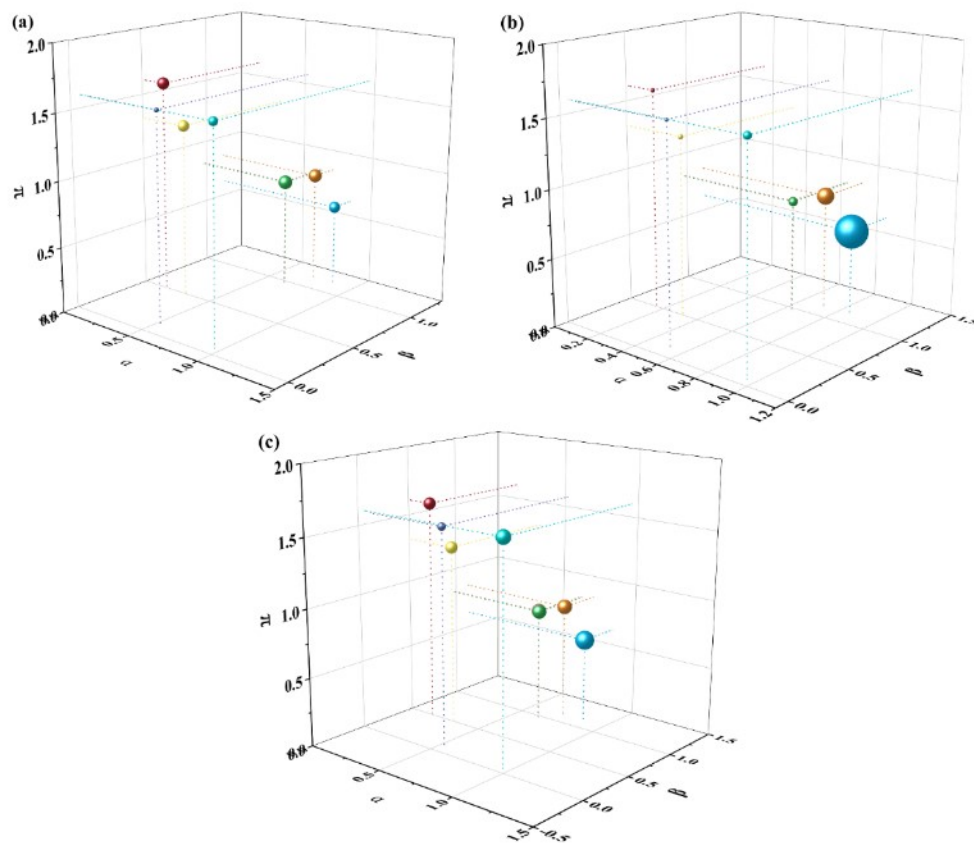

**Fig. S6** The correlation between lignin solubility and the Kamlet–Taft parameters of solvents: (a) hemicellulose, (b) cellulose and (c) lignin. The size of the ball indicates the solubility.



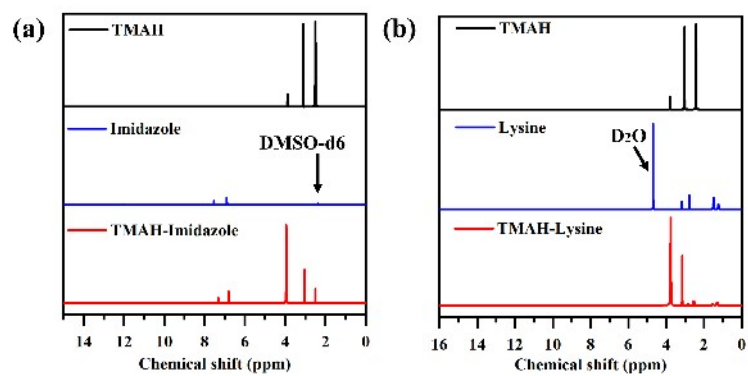

**Fig. S7**  $^1\text{H}$  NMR of TMAH-based DESs: (a) TMAH-Imidazole and (b) TMAH-Lysine.

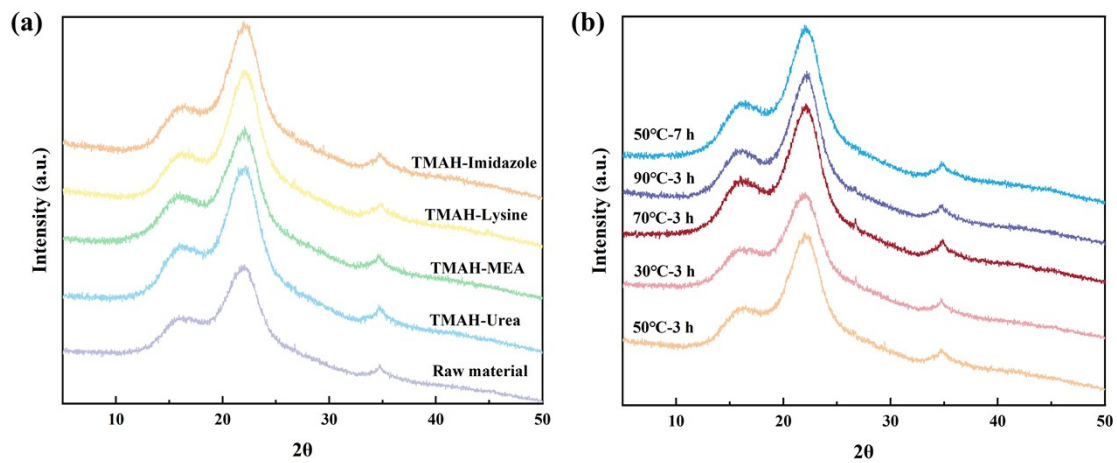

**Fig. S8** XRD pattern of (a) raw material and the substrates treated by different DESs (50°C, 3 h) and (b) the substrates treated by TMAH-Imidazole at different conditions.

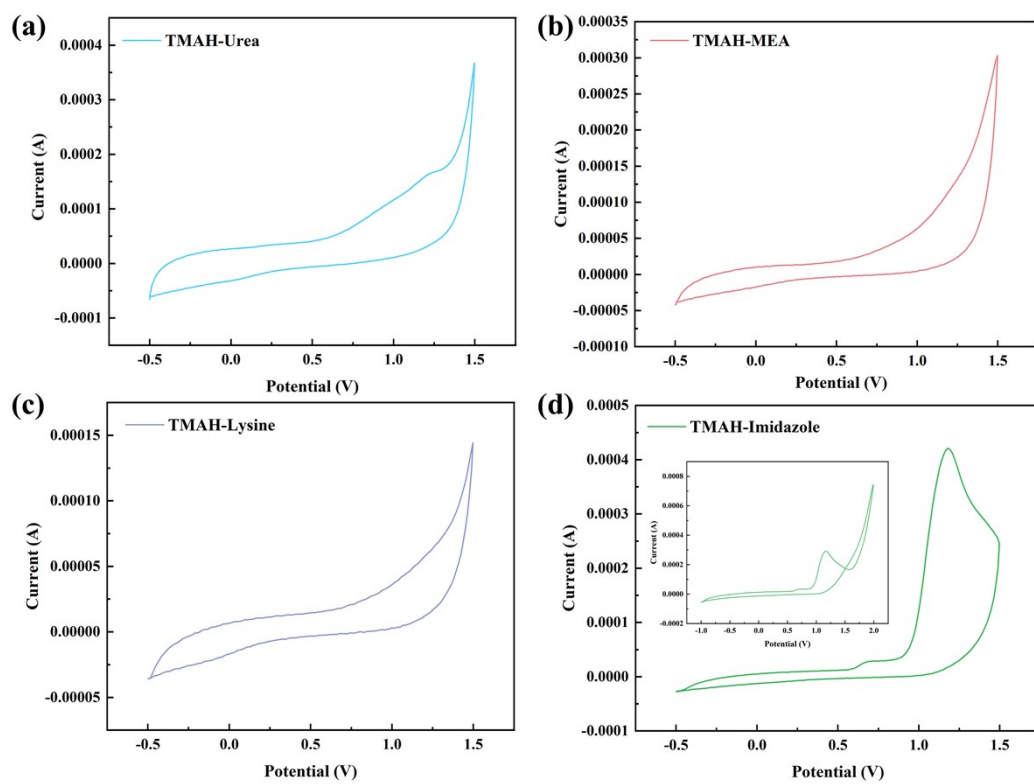

**Fig. S9** Cyclic voltammetry curves of TMAH-based DESs at scan rate of  $20 \text{ mV s}^{-1}$ .

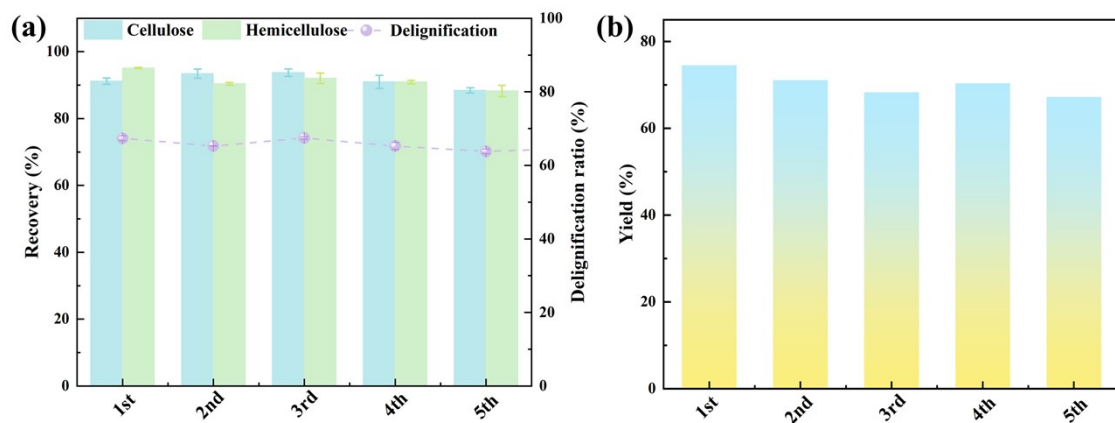

**Fig. S10** Reusability of DES: (a) delignification ratio and Carbohydrate recovery; (b) aromatic monomers yield.

**Table S1** The information of hydrogen bond donors and hydrogen bond acceptors for preparing DESs.

| Hydrogen bond acceptor | Hydrogen bond donor | Molar ratio |
|------------------------|---------------------|-------------|
|                        | Arginine            | 1:1         |
|                        | Lysine              | 1:1         |
|                        | Histidine           | 1:1         |
|                        | Thiourea            | 1:2         |
|                        | Urea                | 1:2         |
| ChCl/[TMAH]Cl/[TEA]Cl/ | MEA                 | 1:6         |
| [TMAH]Br/[TEA]Br/ChOH/ | DEA                 | 1:6         |
| Betaine/TMAH/TEAH      | IPPA                | 1:6         |
|                        | EDM                 | 1:6         |
|                        | Imidazole           | 3:7         |
|                        | Pyrazole            | 3:7         |
|                        | Pyridine            | 3:7         |
|                        | Pyrrole             | 3:7         |
|                        | Arginine            | 1:2         |
|                        | Lysine              | 1:2         |
|                        | Histidine           | 1:2         |
|                        | Thiourea            | 1:4         |
|                        | Urea                | 1:4         |
| [TPA]Cl/[BTMA]Cl/      | MEA                 | 1:12        |
| [TPA]Br/[BTMA]Br/      | DEA                 | 1:12        |
| TPAH/                  | IPPA                | 1:12        |
| BTAH                   | EDM                 | 1:12        |
|                        | Imidazole           | 3:14        |
|                        | Pyrazole            | 3:14        |
|                        | Pyridine            | 3:14        |
|                        | Pyrrole             | 3:14        |

ChCl: Choline chloride (ChCl), [TMAH]Cl: Tetramethylene ammonium chloride, [TEA]Cl: Tetraethylammonium chloride, [TPA]Cl: Tetrapropyl ammonium chloride, [BTMA]Cl: Tetrabutylammonium chloride, [TMAH]Br: Tetramethylammonium bromide, [TEA] Br: Tetraethylammonium bromide, [TPA]Br: Tetrapropyl ammonium bromide, [BTMA]Br: Tetrabutylammonium bromide, ChOH: Choline hydroxide, TMAH: Tetramethylammonium hydroxide, TEAH: Tetraethylammonium hydroxide, TPAH: Tetrapropyl ammonium hydroxide, BTAH: Tetrabutylammonium hydroxide; MEA: Monoethanolamine, DEA: Diethanolamine, IPPA: Isopropanolamine, EDM: Ethylenediamine.

**Table S2** Comparison of the lignocellulose fractionation effect of TMAH-based solvents for reported alkaline DESs

| Solvent type                                   | Material      | Reaction condition | Cellulose recovery | Hemicellulose recovery | Delignification | Ref.      |
|------------------------------------------------|---------------|--------------------|--------------------|------------------------|-----------------|-----------|
| K <sub>2</sub> CO <sub>3</sub> -Glycerol (1:7) | Bamboo        | 130°C, 3 h         | 95%                | 65%                    | 55%             | 2         |
| K <sub>2</sub> CO <sub>3</sub> -Glycol (1:7)   | Coconut shell | 130°C, 1 h         | 86.5%              | 70.2%                  | 70.7%           | 1         |
| Ethanolamine-ChCl (6:1)                        | Bamboo        | 70°C, 9 h          | 90.7%              | 80%                    | 45%             | 3         |
| Imidazole-ChCl (7:3)                           | Populus       | 150°C, 15 h        | 69.2%              | 18.3%                  | 75.5%           | 4         |
| Urea-ChCl (2:1)                                | Populus       | 115°C, 15 h        | 84.5%              | 79.1%                  | 20.0%           | 4         |
| 50% Urea-ChOH (2:1)                            | Rice straw    | 100°C, 2 h         | 85%                | 5%                     | >90%            | 5         |
| 30% Imidazole-TMAH (7:3)                       | Coconut shell | 50°C, 3 h          | 91.2%              | 95.1%                  | 67.4%           | This work |
| 30% Imidazole-TMAH (7:3)                       | Coconut shell | 90°C, 3 h          | 86.9%              | 80.3%                  | 75.5%           | This work |

**Table S3** The NMR assignments of major signals in the 2D-HSQC spectra of MWL and DES extracted lignin.

| Label                              | $\delta_C/\delta_H$ (ppm) | Assignment                                                                              |
|------------------------------------|---------------------------|-----------------------------------------------------------------------------------------|
| C $_{\beta}$                       | 53.0/3.45                 | C $_{\beta}$ -H $_{\beta}$ in phenylcoumarane substructures (C)                         |
| B $_{\beta}$                       | 53.5/3.03                 | C $_{\beta}$ -H $_{\beta}$ in $\beta$ - $\beta$ (resinol) substructures (B)             |
| -OCH $_3$                          | 55.2/3.74                 | C-H in methoxyls                                                                        |
| A $_{\gamma}$                      | 59.7/3.21–3.71            | C $_{\gamma}$ -H $_{\gamma}$ in $\beta$ -O-4 substructures (A)                          |
| A' $_{\gamma}$                     | 63.0/4.30                 | C $_{\gamma}$ -H $_{\gamma}$ in $\gamma$ -acylated $\beta$ -O-4 substructures (A)       |
| I $_{\gamma}$                      | 61.7/4.09                 | C $_{\gamma}$ -H $_{\gamma}$ in cinnamyl alcohol end-groups (I)                         |
| C $_{\gamma}$                      | 62.7/3.67                 | C $_{\gamma}$ -H $_{\gamma}$ in phenylcoumaran substructures (C)                        |
| B $_{\gamma}$                      | 71.2/3.85–4.16            | C $_{\gamma}$ -H $_{\gamma}$ in $\beta$ - $\beta$ (resinol) substructures (B)           |
| A $_{\alpha}$                      | 71.8/4.86                 | C $_{\alpha}$ -H $_{\alpha}$ in $\beta$ -O-4 linked to S units (A)                      |
| A $_{\beta(G)}$ / A' $_{\beta(S)}$ | 83.5/4.27                 | C $_{\beta}$ -H $_{\beta}$ in $\beta$ -O-4 substructures linked to G and H units (A)    |
| B $_{\alpha}$                      | 85.1/4.62                 | C $_{\alpha}$ -H $_{\alpha}$ in $\beta$ - $\beta$ (resinol) substructures (B)           |
| A' $_{\beta(G)}$                   | 83.1/4.48                 | C $_{\beta}$ -H $_{\beta}$ in acylated $\beta$ -O-4 substructures linked to G units (A) |
| A $_{\beta(S)}$                    | 86.0/4.11                 | C $_{\beta}$ -H $_{\beta}$ in $\beta$ -O-4 substructures linked to S units (A)          |
| C $_{\alpha}$                      | 86.8/5.42                 | C $_{\alpha}$ -H $_{\alpha}$ in phenylcoumaran substructures (C)                        |
| S $_{2,6}$                         | 103.4/6.68                | C $_{2,6}$ -H $_{2,6}$ in etherified syringyl units (S)                                 |
| FA $_2$                            | 110.6/7.32                | C $_2$ -H $_2$ in ferulate (FA)                                                         |
| G $_2$                             | 110.5/6.92                | C $_2$ -H $_2$ in guaiacyl units (G)                                                    |
| PCE $_8$                           | 114.6/6.29                | C $_8$ -H $_8$ in <i>p</i> -coumarate (PCE)                                             |
| G $_5$                             | 114.7/6.71                | C $_2$ -H $_2$ in guaiacyl units (G)                                                    |
| G $_6$                             | 118.8/6.75                | C $_6$ -H $_6$ in guaiacyl units (G)                                                    |
| H $_{2,6}$                         | 127.8/7.16                | C $_{2,6}$ -H $_{2,6}$ in <i>p</i> -hydroxyphenyl units (H)                             |
| PCE $_{2,6}$                       | 130.2/7.49                | C $_{2,6}$ -H $_{2,6}$ in <i>p</i> -coumarate (PCE)                                     |
| PB $_{2,6}$                        | 131.3/7.66                | C $_{2,6}$ -H $_{2,6}$ in <i>p</i> -hydroxybenzoate substructures (PB)                  |



**Table S4** Comparison of the yield of aromatic monomers of TMAH-Imidazole for reported solvents.

| Substrate               | Catalyst/Solvent                                                          | Reaction condition                                          | Yield           | Reference |
|-------------------------|---------------------------------------------------------------------------|-------------------------------------------------------------|-----------------|-----------|
| Industrial lignin       | MnO <sub>2</sub> /Methanol                                                | 140°C, 1 h, 1 Mpa<br>O <sub>2</sub>                         | 38% (bio-oil)   | 6         |
| Industrial lignin       | CeO <sub>2</sub> /Methanol                                                | 140°C, 1 h, 1 Mpa<br>O <sub>2</sub>                         | 48% (bio-oil)   | 6         |
| Industrial lignin       | MoO/Methanol                                                              | 140°C, 1 h, 1 Mpa<br>O <sub>2</sub>                         | 40% (bio-oil)   | 6         |
| Alkali lignin           | CuO/NaOH                                                                  | 160°C, 1 h<br>1atm O <sub>2</sub>                           | 13.9%           | 7         |
| Pine                    | CuO/NaOH                                                                  | 160°C, 1 h, 1 Mpa<br>O <sub>2</sub>                         | 33.8.6%         | 7         |
| Pine                    | Fe <sub>3</sub> O <sub>4</sub> /NaOH                                      | 160°C, 1 h, 1 Mpa<br>O <sub>2</sub>                         | 25%             | 7         |
| Pine                    | Al <sub>2</sub> O <sub>3</sub> /NaOH                                      | 160°C, 1 h, 1 Mpa<br>O <sub>2</sub>                         | 23%             | 7         |
| Lignin                  | CuO-<br>Fe <sub>2</sub> (SO <sub>4</sub> ) <sub>3</sub> /NaOH-<br>MeOH    | 150°C, 1 h, 2 mL<br>H <sub>2</sub> O <sub>2</sub> (30 wt.%) | 17.92%          | 8         |
| Dealkali lignin         | SiO <sub>2</sub> -Al <sub>2</sub> O <sub>3</sub><br>H <sub>2</sub> O/MeOH | 250°C, 30 min, 0.7<br>MPa of N <sub>2</sub> ,               | 58%             | 9         |
| Bamboo                  | CuSO <sub>4</sub> -Fe <sub>2</sub> O <sub>3</sub> /NaOH                   | 195 °C, 1.5 h, 0.6<br>Mpa O <sub>2</sub>                    | 40.3% (bio-oil) | 10        |
| Kraft Lignin            | Mn-<br>sepiolite/Supercritical<br>ethanol                                 | 290°C, 4 h, 0.6<br>Mpa O <sub>2</sub>                       | ~40%            | 11        |
| DES-extracted<br>lignin | MnO <sub>2</sub> /TMAH-<br>Imidazole                                      | 100°C, 2 h, 1 Mpa<br>O <sub>2</sub>                         | 74.54%          | This work |

## Reference

- 1 C. He, X. Li, F. Luo, C. Mi, A. Zhan, R. Ou, J. Fan, J. H. Clark and Q. Yu, *ACS Sustain. Chem. Eng.*, 2024, **12**, 11327–11337.
- 2 F. Shen, S. Wu, M. Huang, L. Zhao, J. He, Y. Zhang, S. Deng, J. Hu, D. Tian and F. Shen, *Green Chem.*, 2022, 5242–5254.
- 3 Y. Guo, L. Xu, F. Shen, J. Hu, M. Huang, J. He, Y. Zhang, S. Deng, Q. Li and D. Tian, *Chemosphere*, 2022, **286**, 131798.
- 4 H. Li, X. Li, T. You, D. Li, H. Nawaz, X. Zhang and F. Xu, *Int. J. Biol. Macromol.*, 2021, **193**, 319–327.
- 5 Y. Jiang, F. Shen, B. Jiang, Y. Hu, J. Hu, M. Huang, L. Zhao, H. Wu, D. Tian and F. Shen, *Chem. Eng. J.*, 2024, **479**, 147610.
- 6 A. Kumar, B. Biswas, R. Kaur, S. Rawat, B. B. Krishna, P. Kumbhar, S. Pal, S. Padmanabhan and T. Bhaskar, *Bioresour. Technol.*, 2022, **352**, 127032.
- 7 Y. Zhu, Y. Liao, L. Lu, W. Lv, J. Liu, X. Song, J. Wu, L. Li, C. Wang, L. Ma and B. F. Sels, *ACS Catal.*, 2023, **13**, 7929–7941.
- 8 X. Ouyang, T. Ruan and X. Qiu, *Fuel Process. Technol.*, 2016, **144**, 181–185.
- 9 A. K. Deepa and P. L. Dhepe, *ACS Catal.*, 2015, **5**, 365–379.
- 10 C. S. McCallum, W. Wang, W. J. Doran, W. G. Forsythe, M. D. Garrett, C. Hardacre, J. J. Leahy, K. Morgan, D. S. Shin and G. N. Sheldrake, *Green Chem.*, 2021, **23**, 1847–1860.
- 11 M. Chen, W. Dai, Y. Wang, Z. Tang, H. Li, C. Li, Z. Yang and J. Wang, *Fuel*, 2023, **333**, 126365.
